# Supplementary material for: Phytochemical Profiling, Network Pharmacology, and Molecular Dynamics Simulations of Sinularia levi Metabolites as Potent α-Glucosidase Inhibitors in Metabolic Syndrome
Source: Research Square preprint supplement (doi:10.21203/rs.3.rs-8761838/v1), 2026-02-12
Supplement: Supplementary file 1 [file 09acfa6b0b6c791cb0065e04.docx]

**Phytochemical Profiling, Network Pharmacology, and Molecular Dynamics Simulations of *Sinularia levi* Metabolites as Potent** α-**Glucosidase Inhibitors in Metabolic Syndrome**

Basma Khalaf Mahmoud1≠, Mamdouh Nabil Samy1≠, Francisco Les2,3,Hesham A. Abou-Zied4**,** Nada M. Mostafa5*, Hashem A Madkour6, Elsayed A.E. Hamed7, Mostafa E. Rateb8, Usama Ramadan Abdelmohsen1,9*, and Hanaa Bahaa Elkhouly1

1 Department of Pharmacognosy, Faculty of Pharmacy, Minia University, 61519 Minia, Egypt

2 Department of Pharmacy, Faculty of Health Sciences, Universidad San Jorge, 50830 Zaragoza, Spain

3 Instituto Agroalimentario de Aragón-IA2, CITA-Universidad de Zaragoza, 50059 Zaragoza, Spain

4Department of Medicinal Chemistry, Faculty of Pharmacy, Deraya University, Minia 61111, Egypt.hisham.alaa@deraya.edu.eg

5Department of Pharmacognosy, Faculty of Pharmacy, Ain Shams University, Cairo 11566, Egypt.

6Department of Marine and environmental Geology, National institute of oceanography and Fisheries Red Sea Branch 84511 Hurghada, Egypt

7National institute of oceanography and Fisheries, Hurghada-Red Sea (NIOF) 84511, Egypt

8Natural and Medical Sciences Research Center, University of Nizwa, P. O. Box 33, Birkat Al Mauz, Nizwa, Oman

9Department of Pharmacognosy, Faculty of Pharmacy, Deraya University, 61111 New Minia, Egypt.

≠Those authors have equally contributed.

*Correspondence:

(U.R.A.) E-mail: [Usama.ramadan@mu.edu.eg](mailto:Usama.ramadan@mu.edu.eg); Fax: +20-086-2369075; Tel: +20-086-2347759

(N.M.M.) E-mail: [nadamostafa@pharma.asu.edu.eg](mailto:nadamostafa@pharma.asu.edu.eg); Tel: +20-1011779590

**Abstract:**

This study has investigated the phytochemical composition and therapeutic potential of the Red Sea soft coral *Sinularia levi*. Five compounds (**1-5**) comprising three glyceryl derivatives, a ceramide, and a diterpene were isolated and characterized. To elucidate their role in metabolic syndrome, an integrated network pharmacology and structure-based modelling workflow was employed. This approach identified 45 shared targets between *S. levi* metabolites and disease proteins, clustered into inflammatory and metabolic nodes, with α-glucosidase (GAA) emerging as a primary target. Molecular docking against GAA (PDB: 5NN8) identified glyceryl nonacosanol (**2**) as the most potent ligand (–8.5 kcal/mol), stabilized by a unique glycerol-head polar clamp involving Glu139 and Lys137. The stability of this complex was confirmed through a 100-ns MD simulation, which demonstrated sustained equilibrium and persistent hydrogen bonding*. In vitro* assays revealed that the total extract possesses significant antioxidant activity (DPPH IC50​ = 18.66 μg/mL), the isolated compounds exhibited selective enzyme inhibition. In which, Glyceryl nonacosanol (**2**) proved to be the most effective α-glucosidase inhibitor (IC50​=326.77 μg/mL), whereas glyceryl pentacosanoate (**5**) showed the highest activity against pancreatic lipase (IC50​= 170.75 μg/mL). These findings suggest that *S. levi* metabolites, particularly glyceryl nonacosanol, represent promising leads for managing postprandial glucose levels.

**Keywords:** *Sinularia levi*; network pharmacology; antioxidant; lipase inhibitor; α-glucosidase.

**Compound 1 Glyceryl tridecyloxy nonanoate**
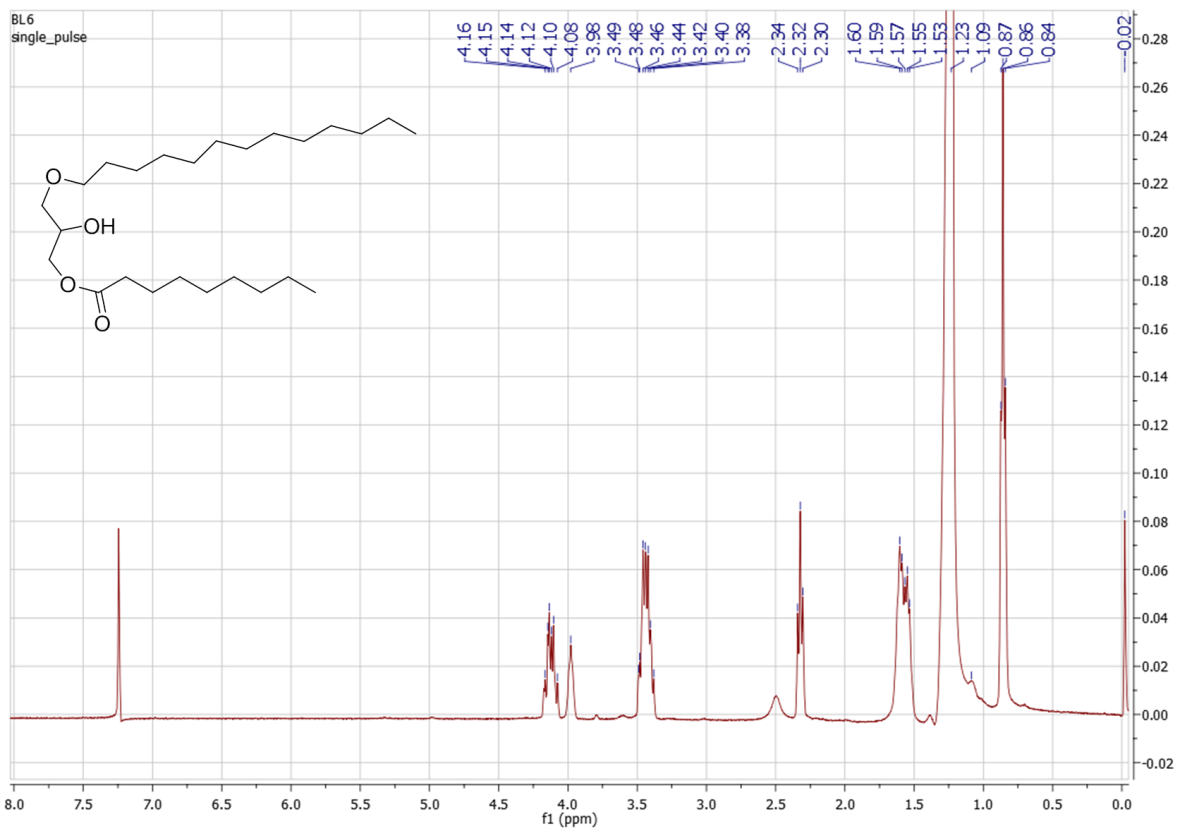


**Figure S1: 1H-NMR spectrum of Compound 1 (400 MHz, CDCl3)**

**Figure S2: 13C-NMR spectrum of Compound 1 (CDCl3, 100 MHz)**

**Figure S3: HMQC spectrum of Compound 1.**

**Figure S4: HMBC spectrum of Compound 1.**

**
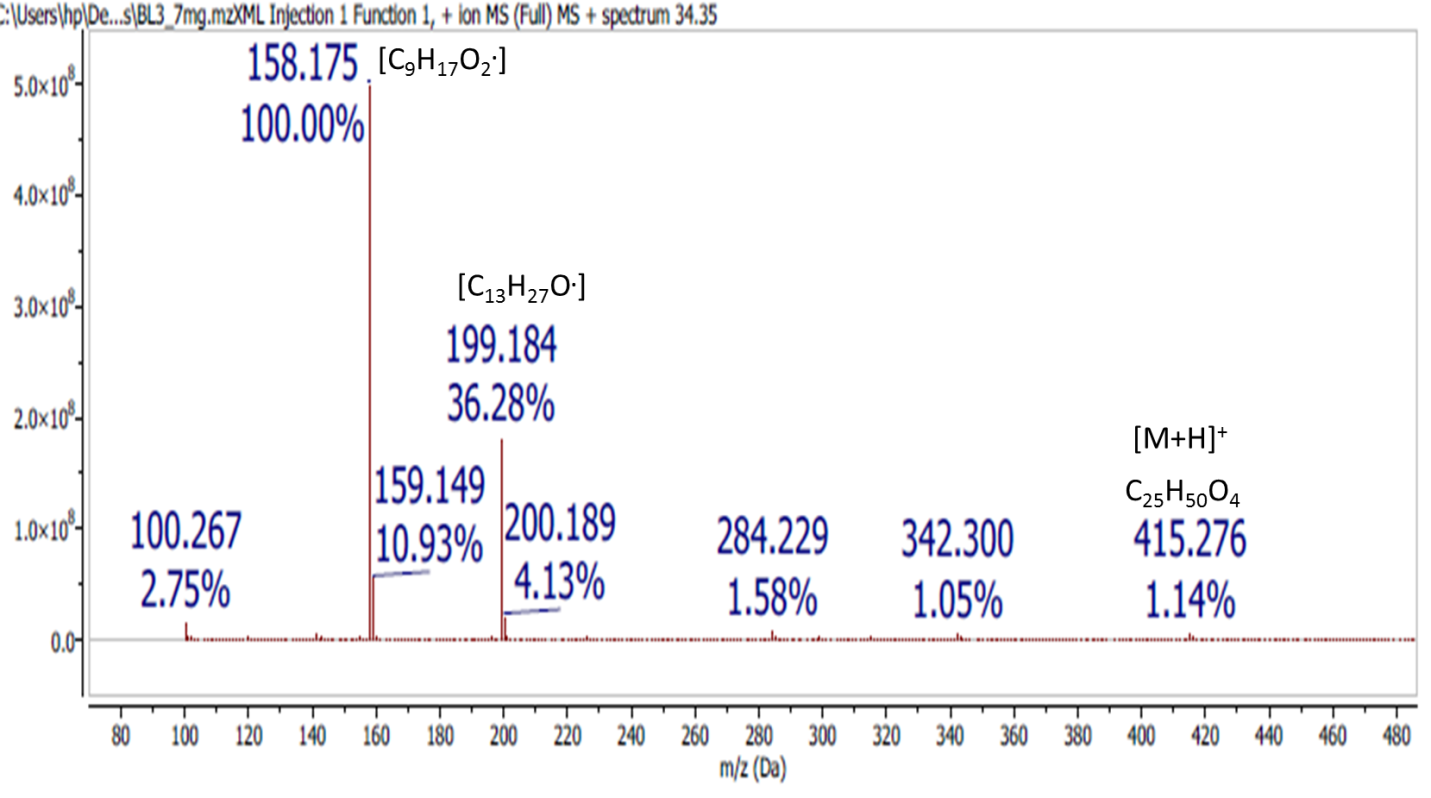
**

**Figure S5: HR-ESI-MS positive ion mode mass spectrum of Compound 1.**

**Compound 2 (Glyceryl nonacosanol)**


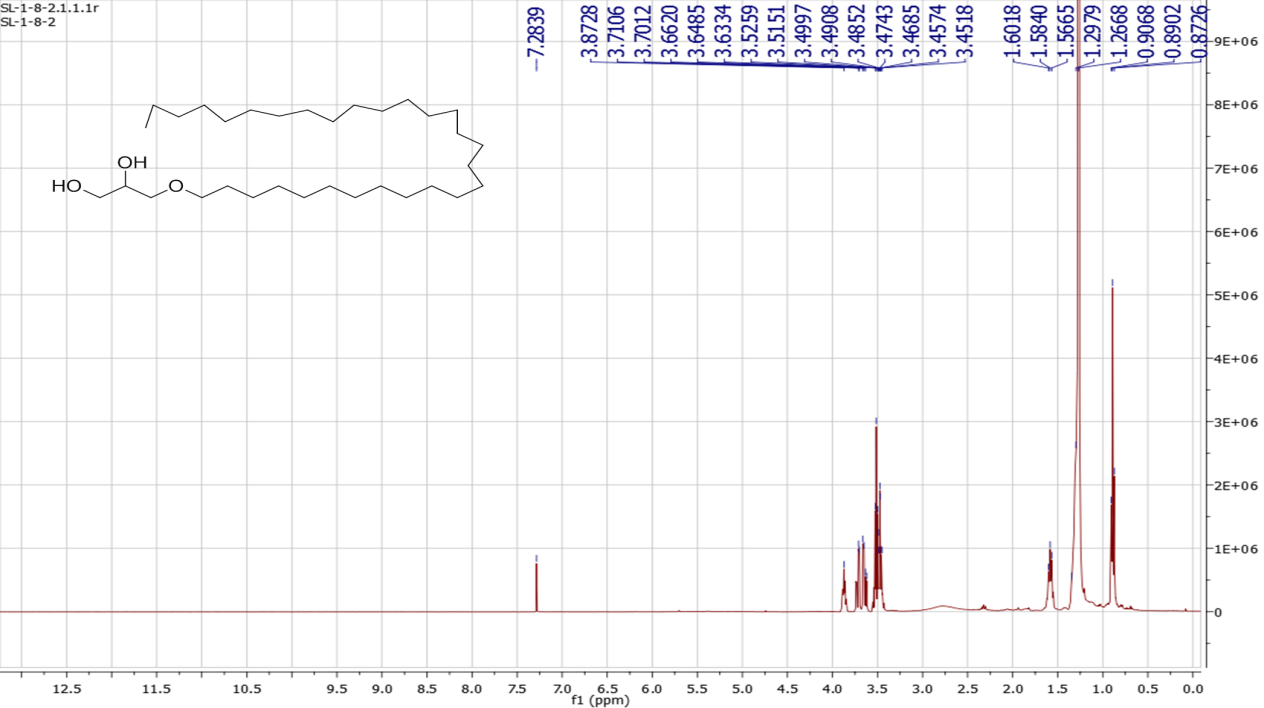


**Figure S6: 1H-NMR spectrum of Compound 2 (400 MHz, CDCl3)**


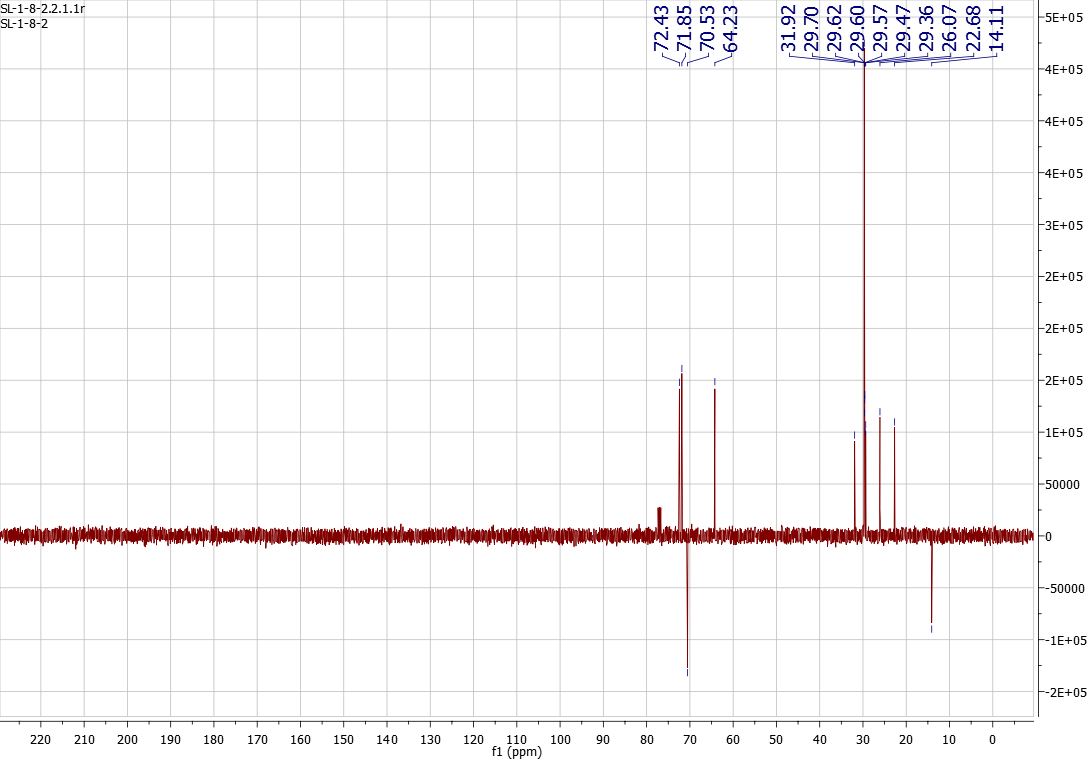


**Figure S7: APT spectrum of Compound 2 (100 MHz, CDCl3)**


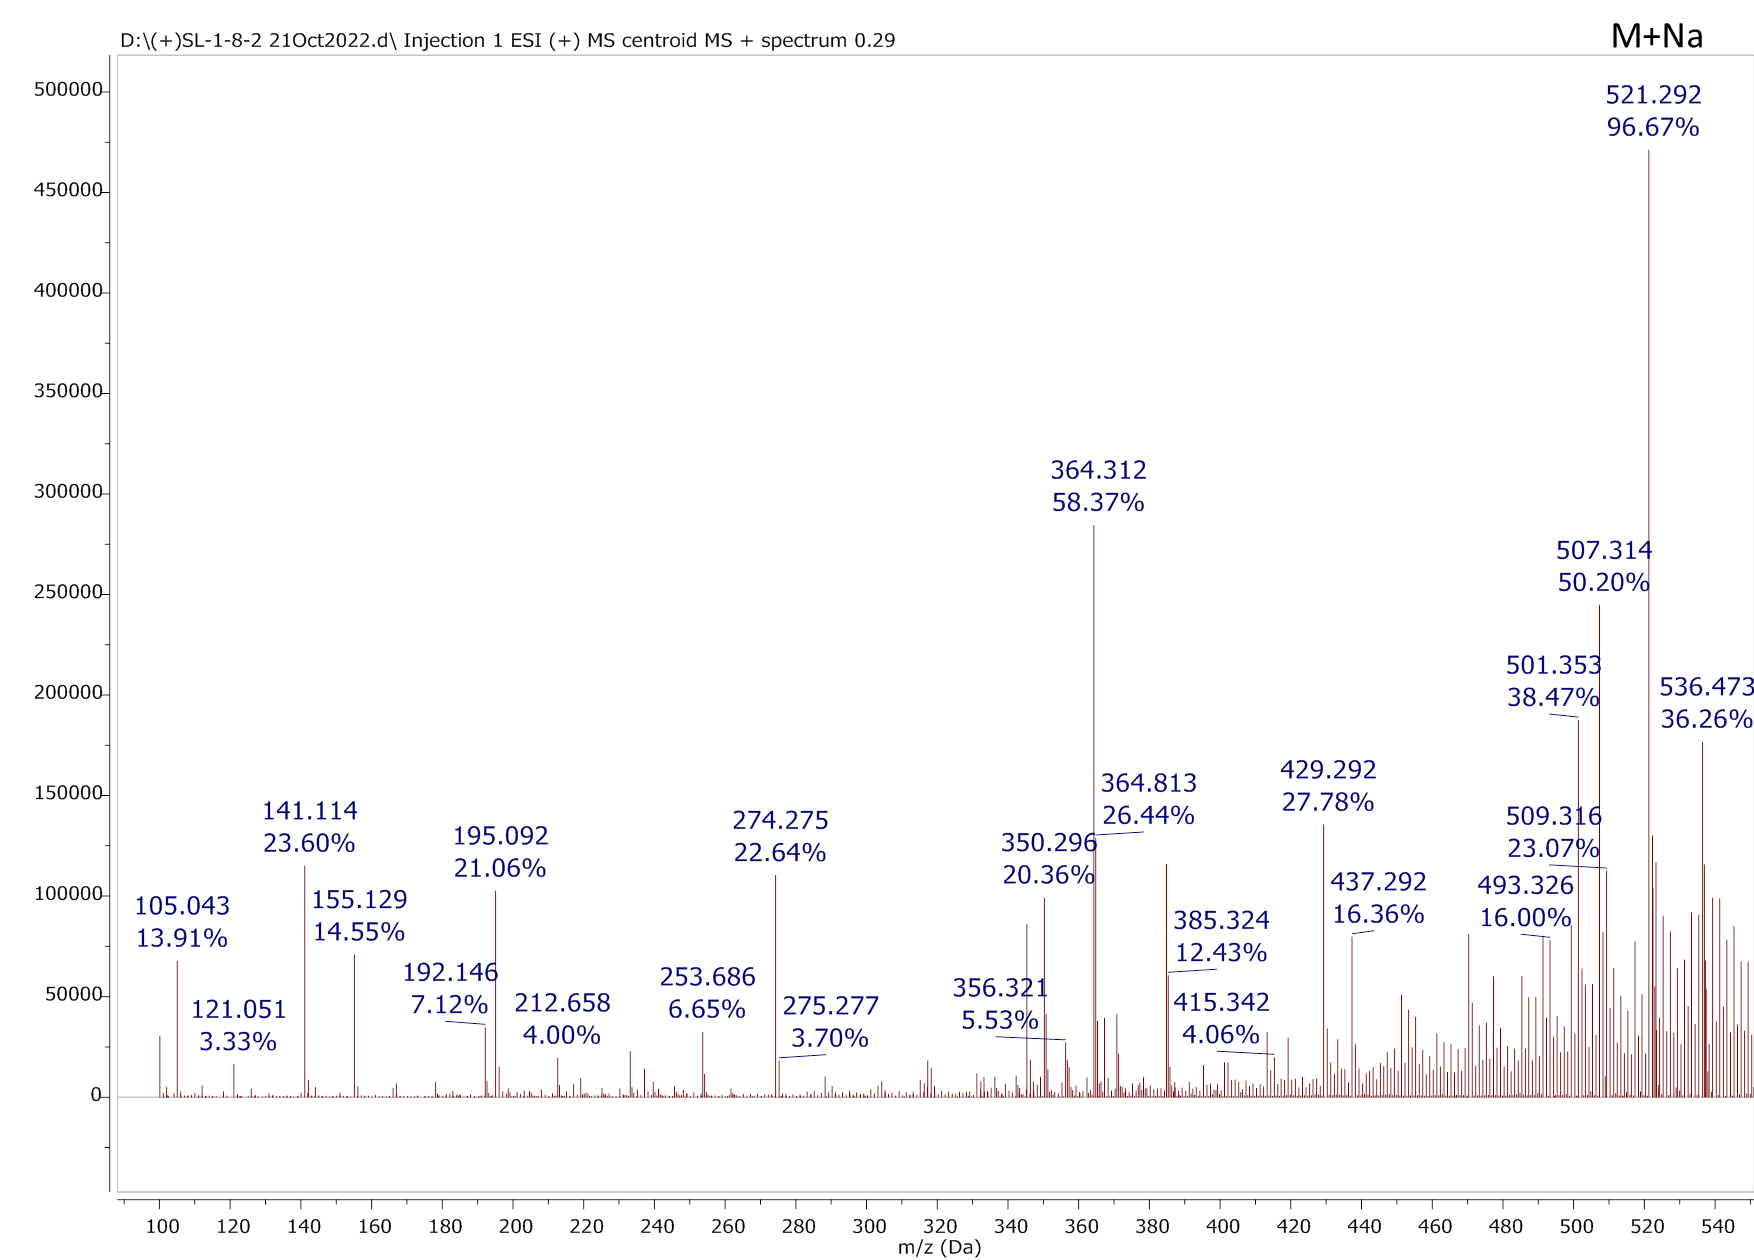


**Figure S8: HR-ESI-MS positive ion mode mass spectrum of Compound 2.**

**Compound 3 (Sinumaximol G)**


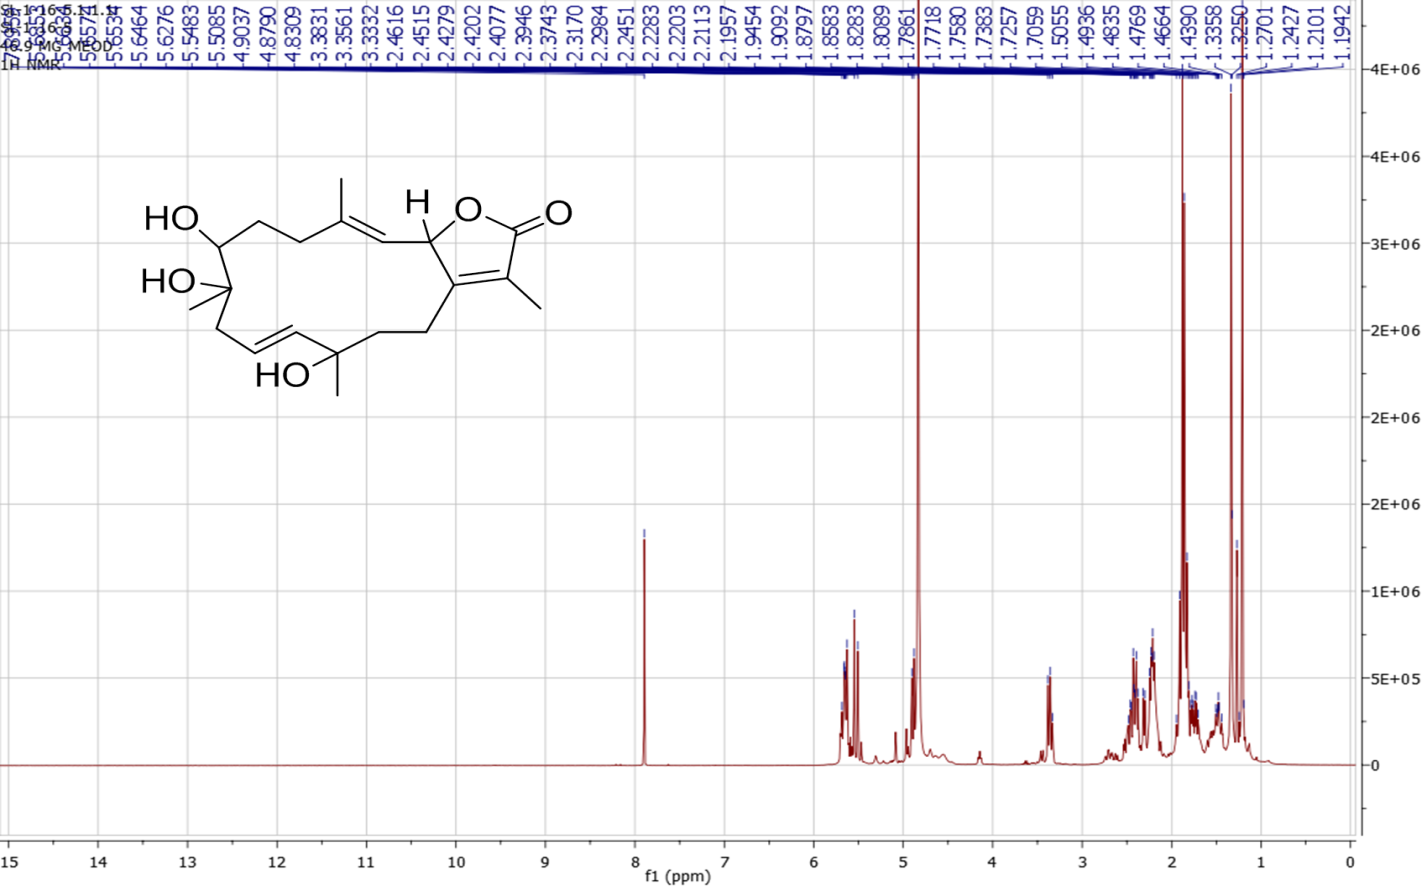


**Figure S9: 1H-NMR spectrum of Compound 3 (400 MHz, CDCl3)**

**Figure S10: 13C-NMR spectrum of Compound 3 (100 MHz, CDCl3).**

**Figure S11: DEPT spectrum of Compound 3 (100 MHz, CDCl3).**


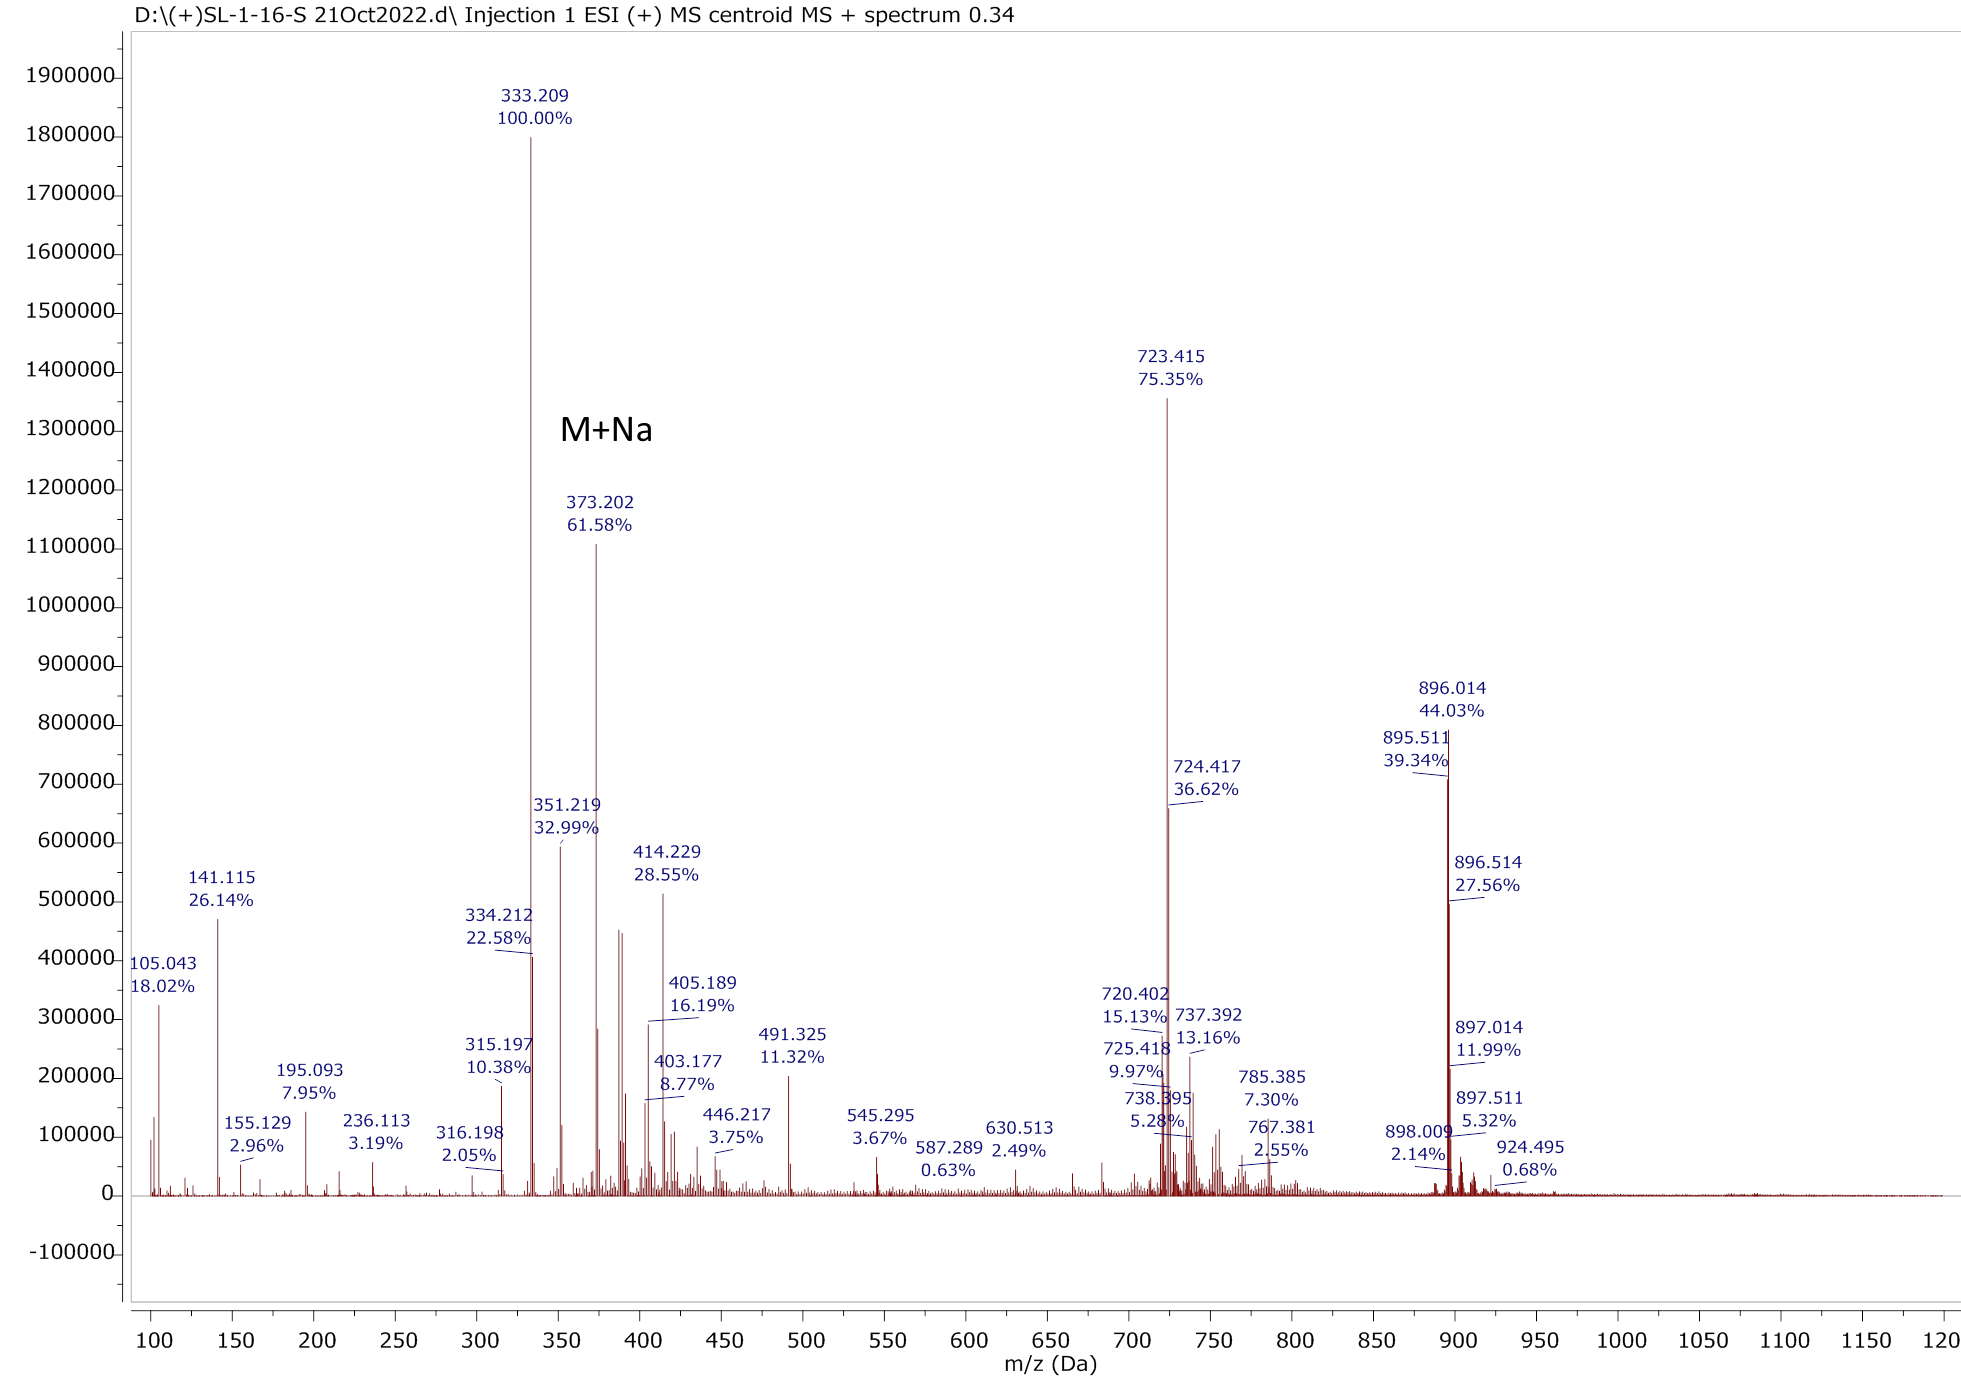


**Figure S12: HR-ESI-MS positive ion mode mass spectrum of Compound 3.**

**Compound 4 (N-palmitoyloctadecasphinga-4(*E*),8(*E*)-dienine)**


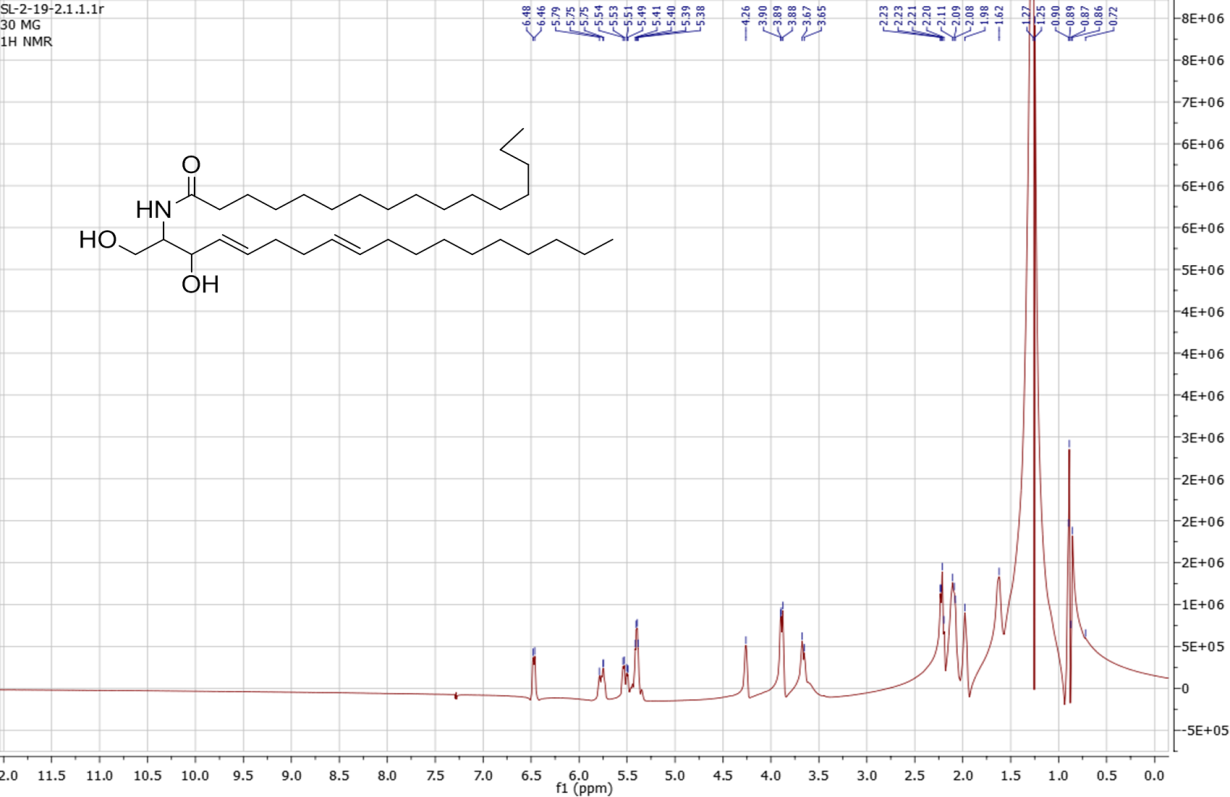


**Figure S13: 1H-NMR spectrum of Compound 4 (400 MHz, CDCl3).**


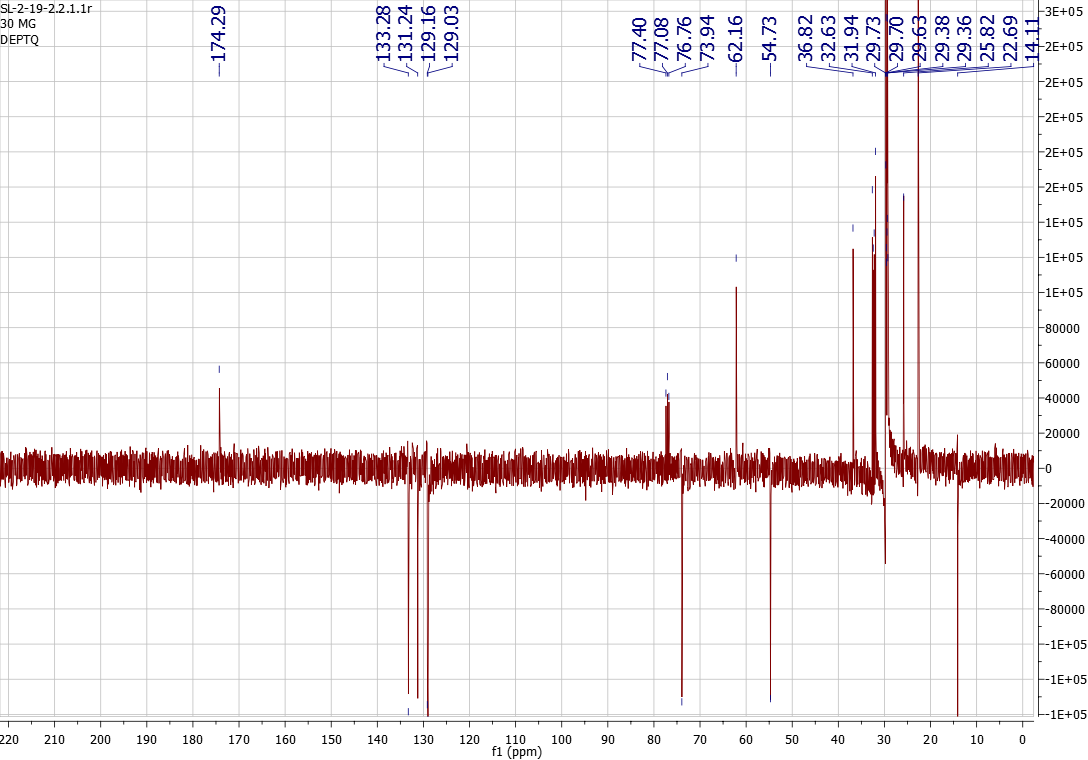


**Figure S14: DEPT-Q spectrum of Compound 4 (100 MHz, CDCl3).**


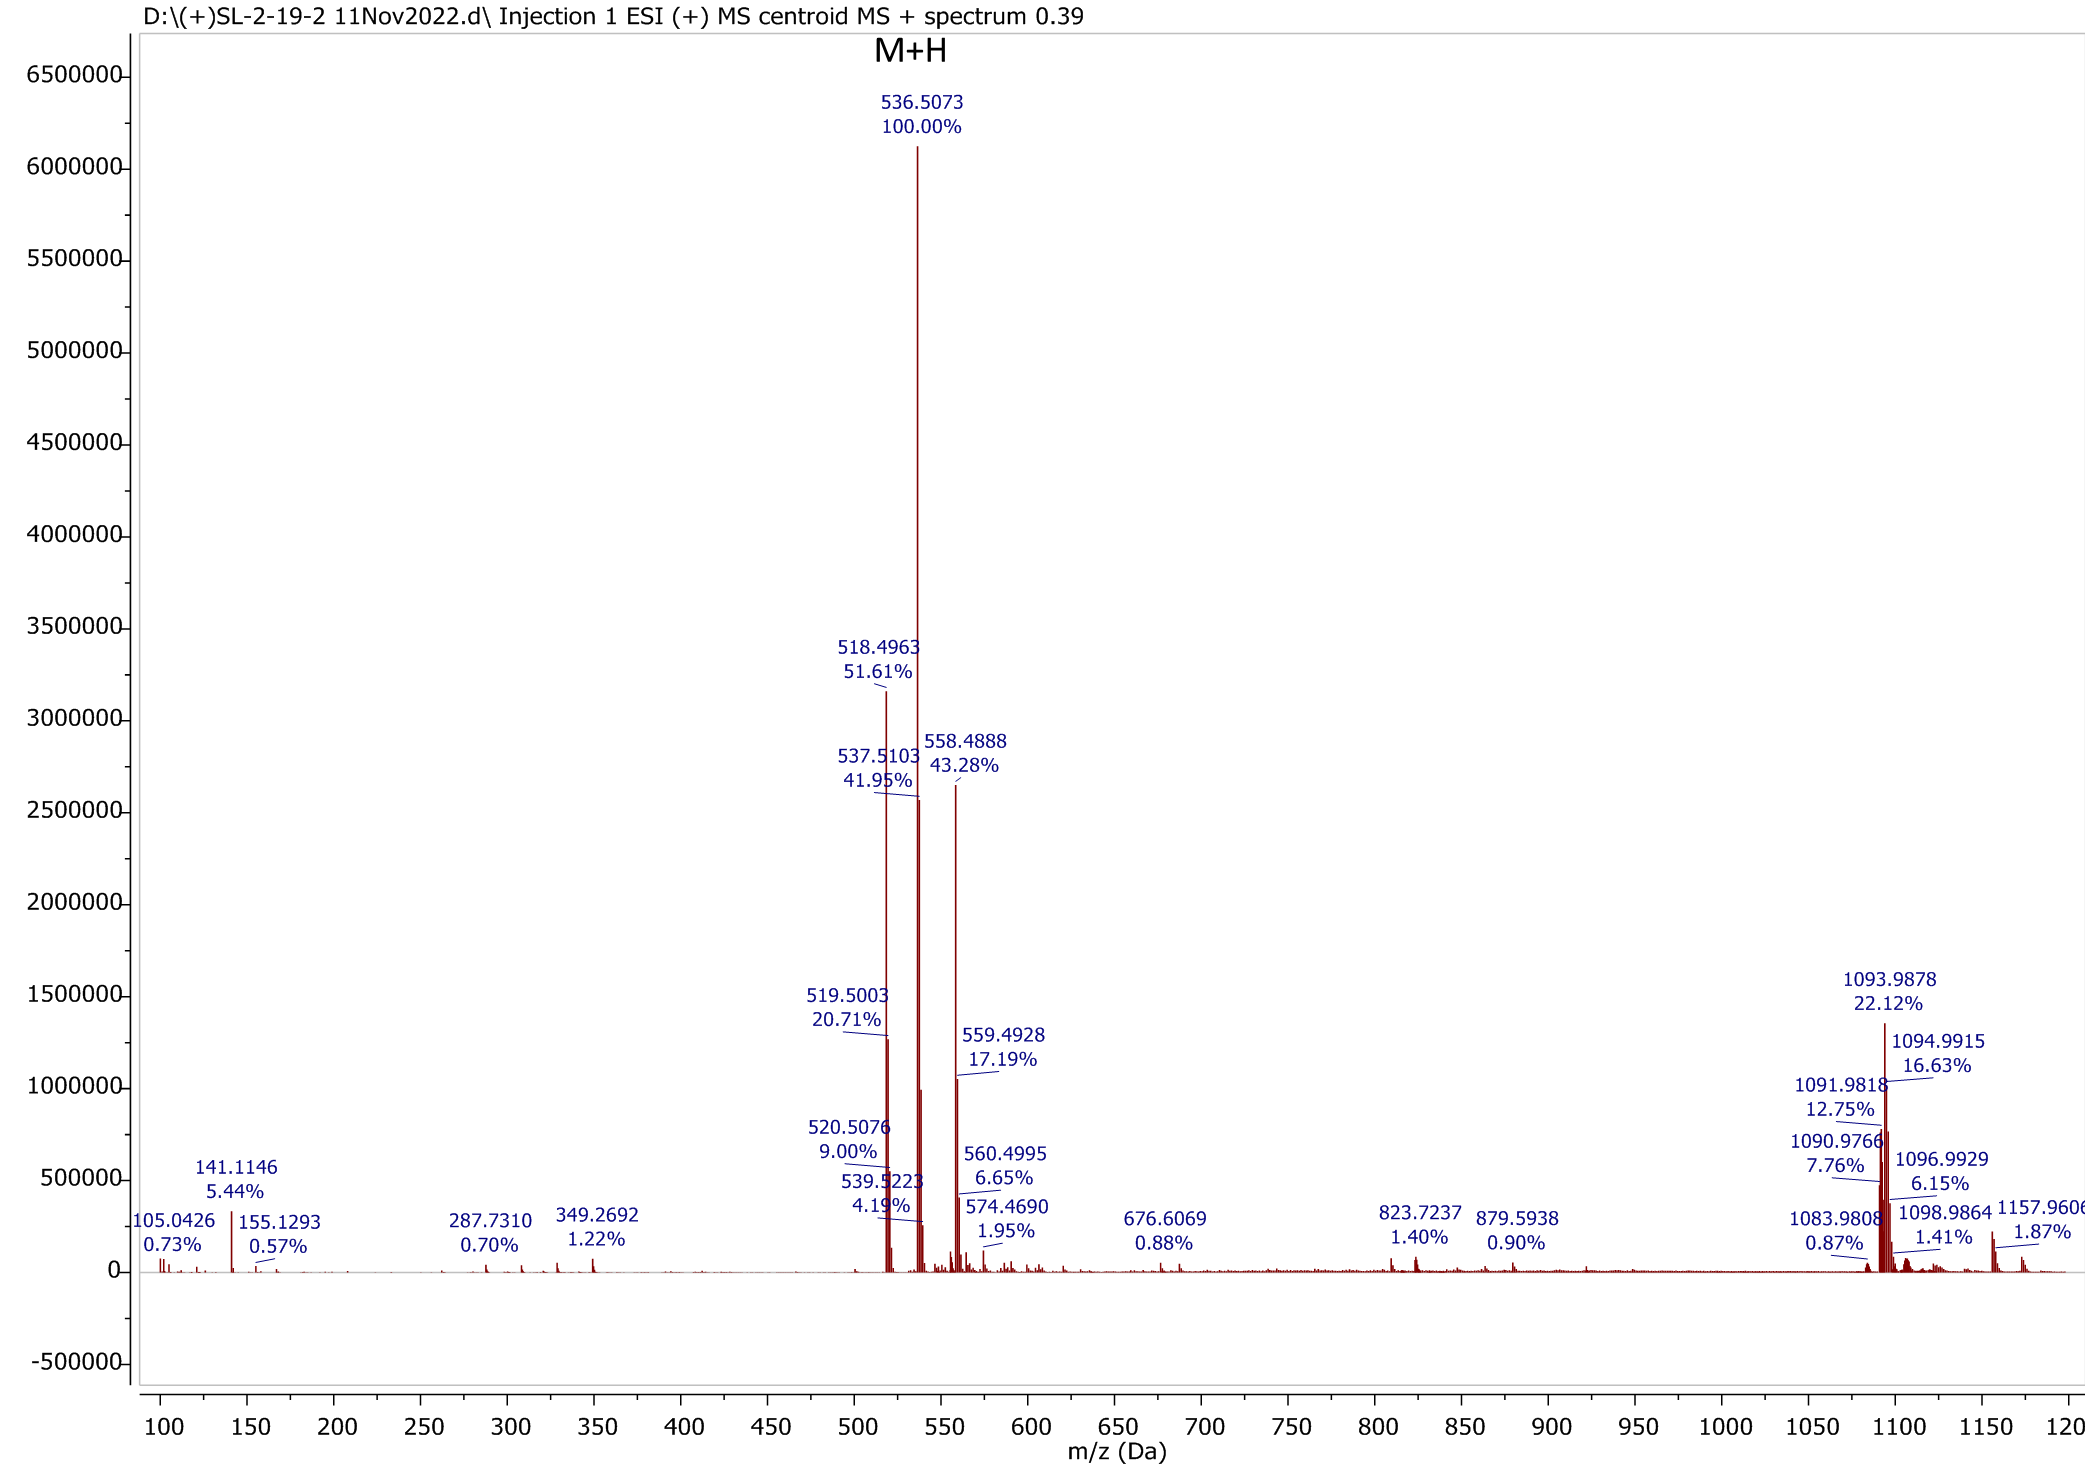


**Figure S15: HR-ESI-MS positive ion mode mass spectrum of Compound 4.**

**Compound 5 (Glyceryl pentacosanoate)**


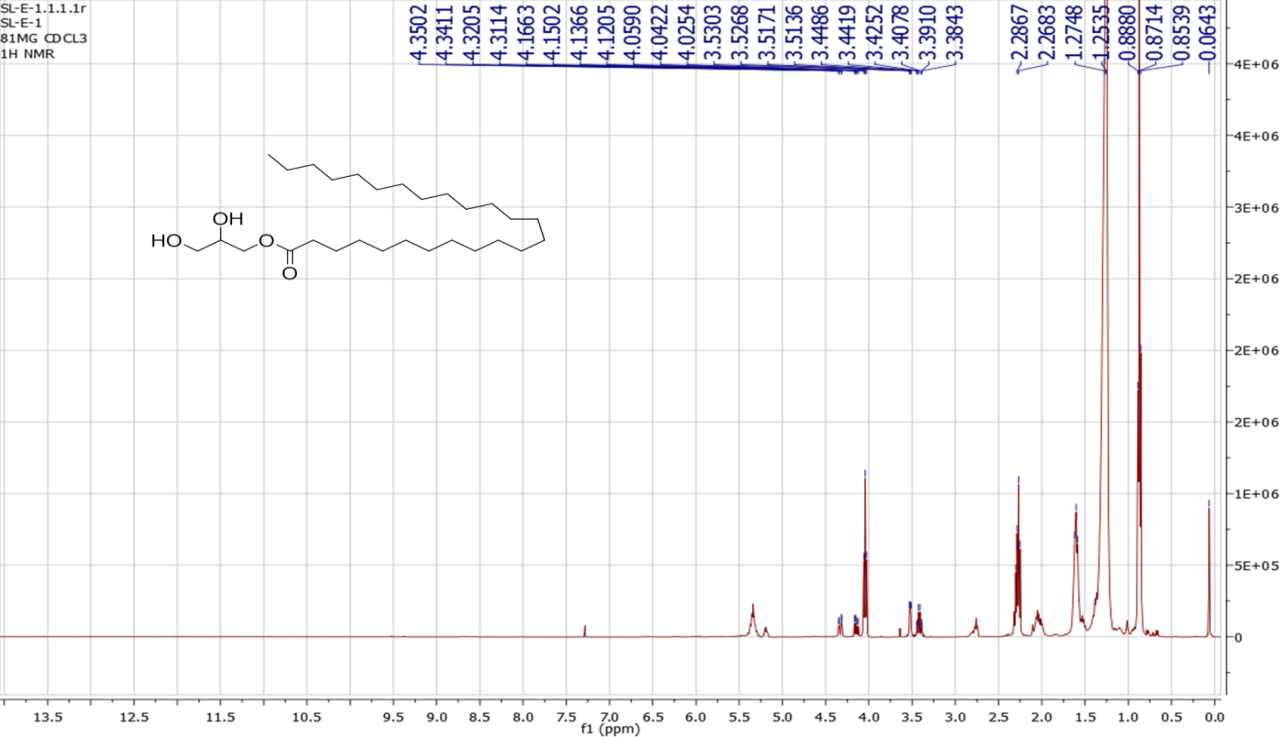


**Figure S16: 1H-NMR spectrum of Compound 5 (400 MHz, CDCl3)**


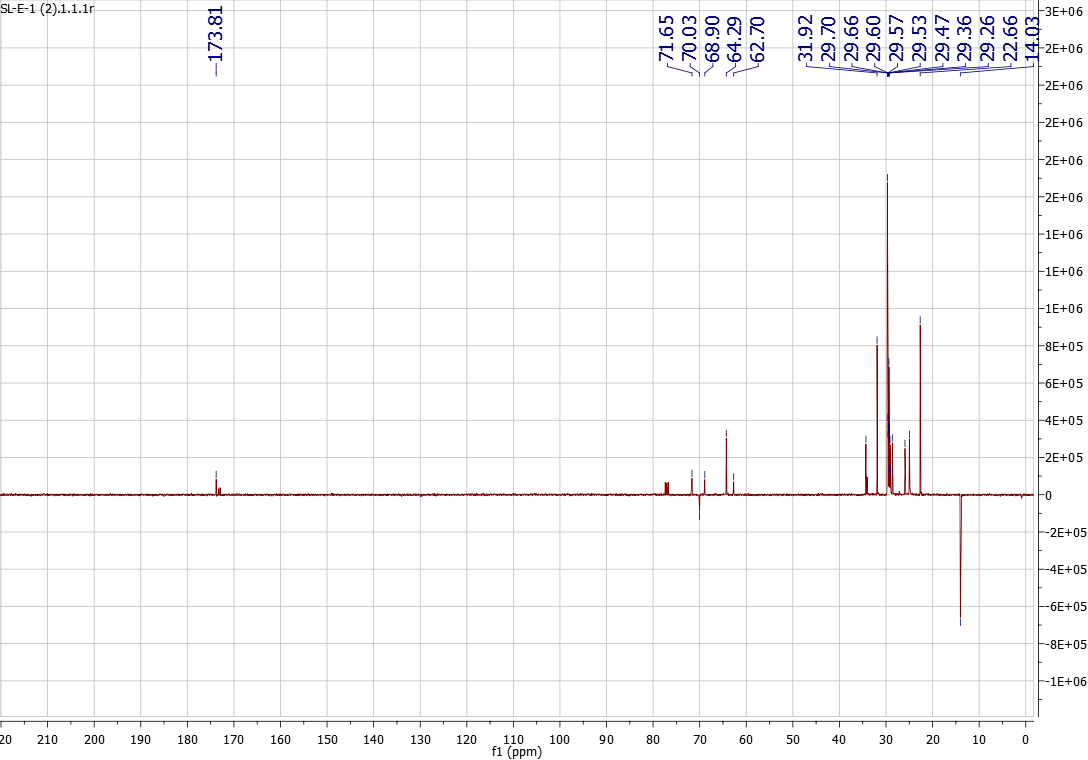


**Figure S17: APTspectrum of Compound 5 (100 MHz, CDCl3)**


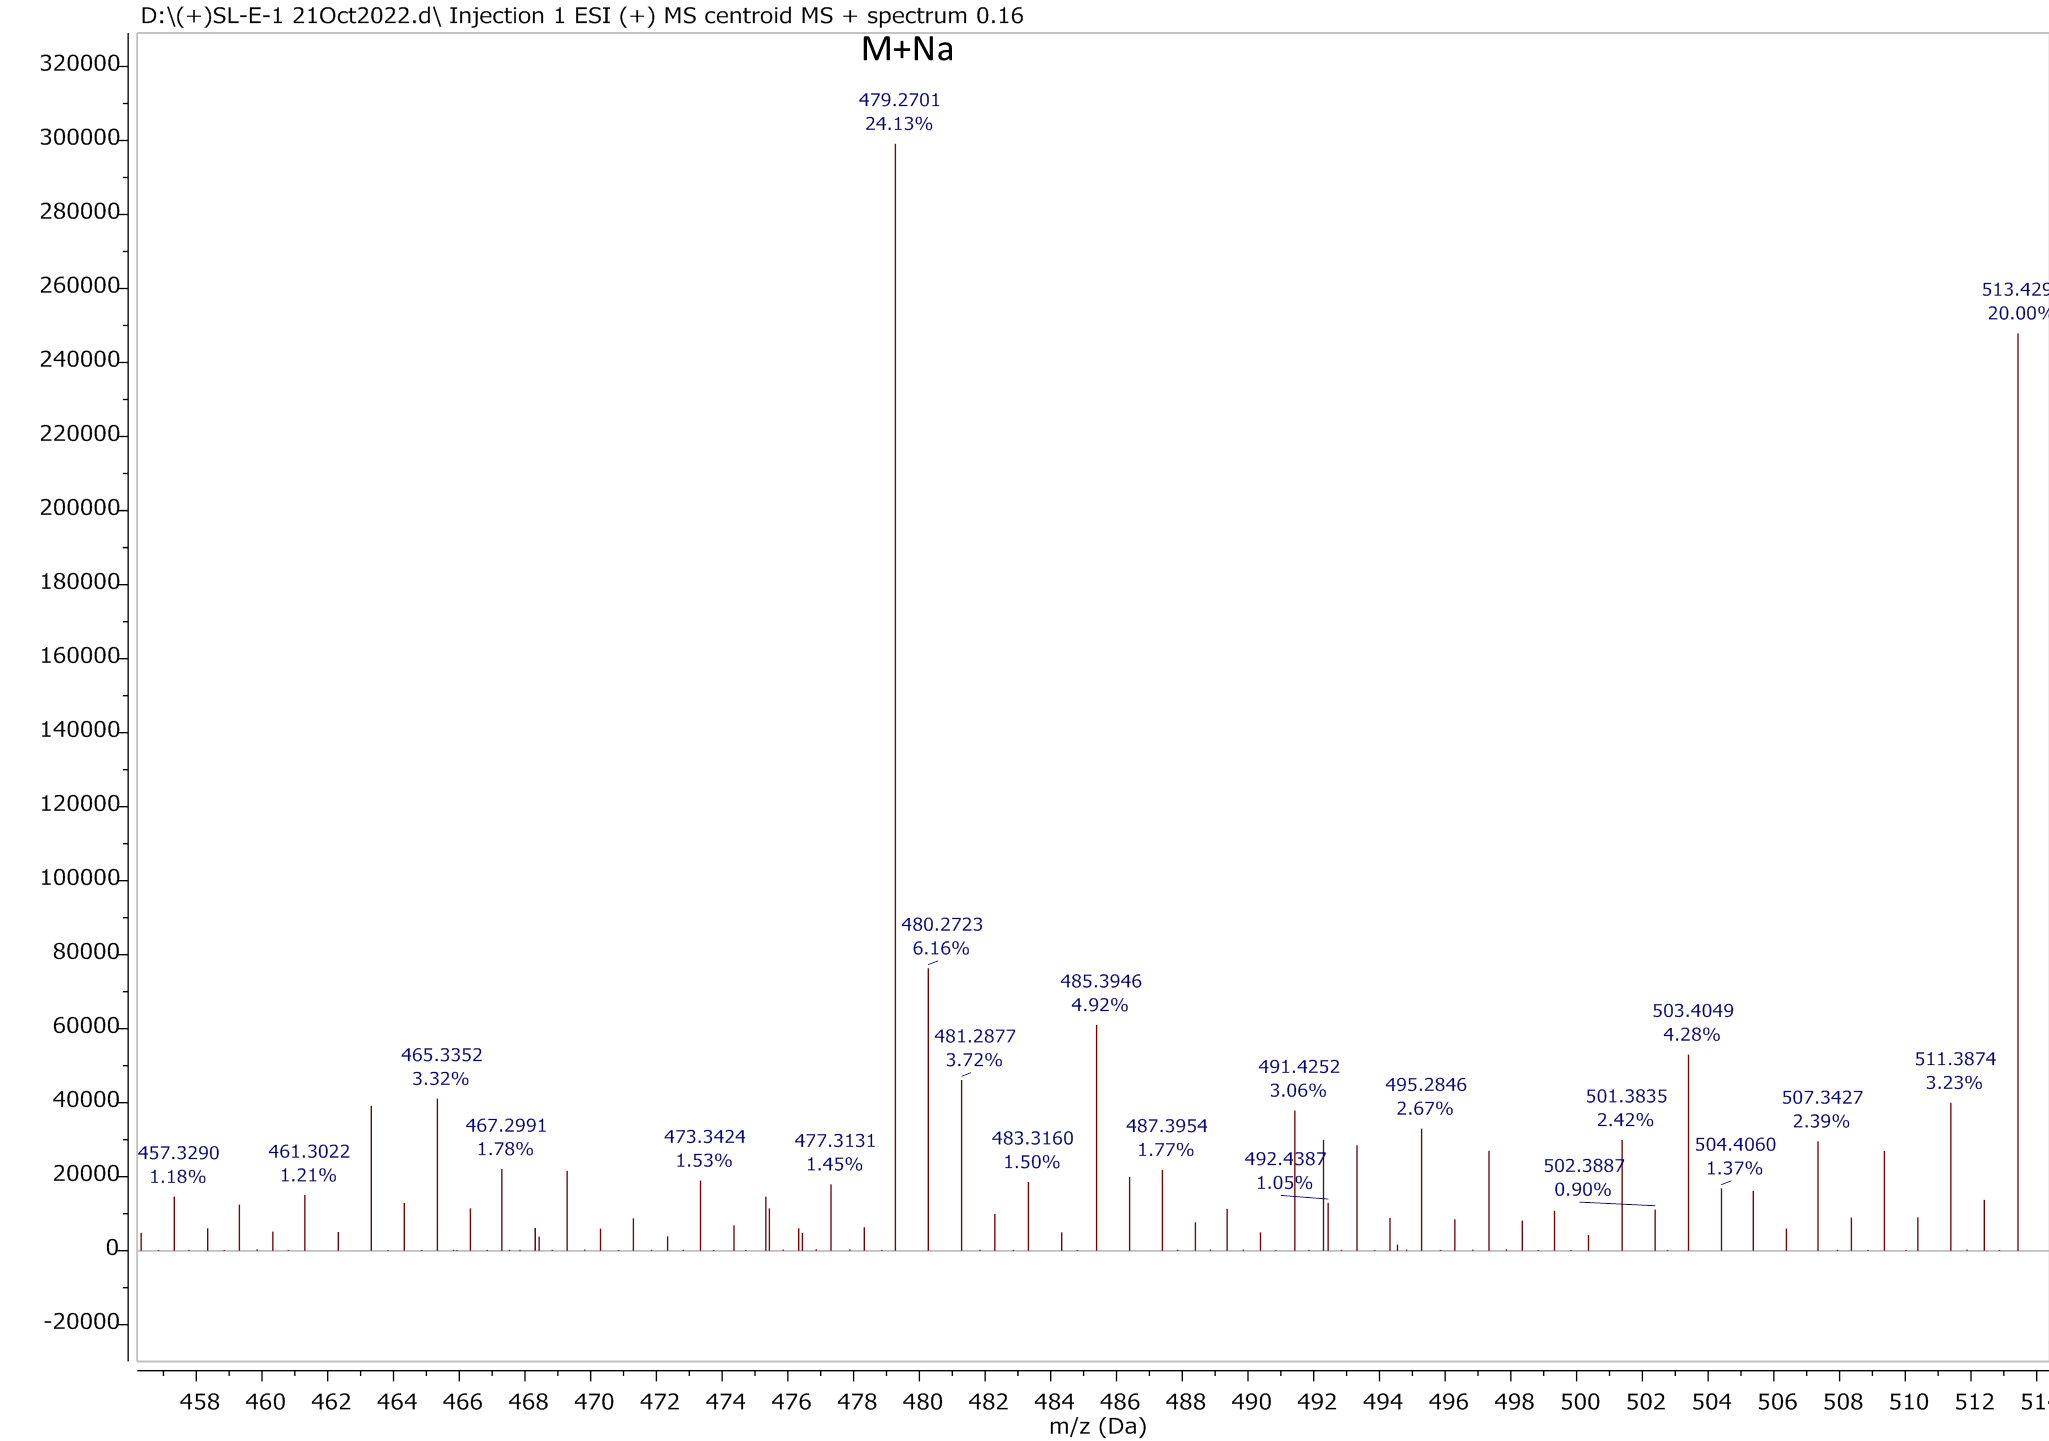


**Figure S18: HR-ESI-MS positive ion mode mass spectrum of Compound 5.**

**Table S1: List of proteins related to metabolic syndrome**.

| **Protein** |
| --- |
| PNLIP (Pancreatic Lipase) |
| MGAM (Maltase-Glucoamylase) |
| AMY2A (Alpha-Amylase 2A) |
| GAA (Acid Alpha-Glucosidase) |
| INSR (Insulin Receptor) |
| IRS1 (Insulin Receptor Substrate 1) |
| IRS2 (Insulin Receptor Substrate 2) |
| PIK3CA (Phosphatidylinositol-4,5-Bisphosphate 3-Kinase Catalytic Subunit Alpha) |
| AKT2 (RAC-Beta Serine/Threonine-Protein Kinase) |
| FOXO1 (Forkhead Box Protein O1) |
| PPARG (Peroxisome Proliferator-Activated Receptor Gamma) |
| PPARA (Peroxisome Proliferator-Activated Receptor Alpha) |
| PRKAA1 (5'-AMP-Activated Protein Kinase Catalytic Subunit Alpha-1) |
| SREBF1 (Sterol Regulatory Element-Binding Transcription Factor 1) |
| SREBF2 (Sterol Regulatory Element-Binding Transcription Factor 2) |
| LPL (Lipoprotein Lipase) |
| APOE (Apolipoprotein E) |
| MTOR (Mechanistic Target of Rapamycin Kinase) |
| MST1R (Macrophage Stimulating 1 Receptor) |
| TNF (Tumor Necrosis Factor) |
| IL6 (Interleukin 6) |
| SOCS3 (Suppressor of Cytokine Signaling 3) |
| MAPK8 (Mitogen-Activated Protein Kinase 8) |
| PTEN (Phosphatase and Tensin Homolog) |
| ROCK1 (Rho Associated Coiled-Coil Containing Protein Kinase 1) |
| GSK3B (Glycogen Synthase Kinase 3 Beta) |
| SLC2A4 (Solute Carrier Family 2 Member 4) |
| FABP4 (Fatty Acid Binding Protein 4) |
| LEP (Leptin) |
| ADIPOQ (Adiponectin) |
| CEBPA (CCAAT Enhancer Binding Protein Alpha) |
| CEBPB (CCAAT Enhancer Binding Protein Beta) |
| LIPE (Hormone-Sensitive Lipase) |
| DGAT2 (Diacylglycerol O-Acyltransferase 2) |
| ACLY (ATP Citrate Lyase) |
| SCD1 (Stearoyl-CoA Desaturase 1) |
| ACADM (Acyl-CoA Dehydrogenase Medium Chain) |
| UCP1 (Uncoupling Protein 1) |
| SIRT1 (NAD-Dependent Protein Deacetylase Sirtuin 1) |
| GLP1R (Glucagon-Like Peptide 1 Receptor) |
| TOP1 (DNA Topoisomerase I) |
| TOP2A (DNA Topoisomerase II Alpha) |
| TOP2B (DNA Topoisomerase II Beta) |
| KDR (Vascular Endothelial Growth Factor Receptor 2) |
| CYP19A1 (Aromatase) |
| ADIPOQ (Adiponectin) |
| LEPR (Leptin Receptor) |
| FTO (Fat Mass and Obesity-Associated Protein) |
| MC4R (Melanocortin 4 Receptor) |
| SLC2A2 (Solute Carrier Family 2 Member 2) |
| SLC2A1 (Solute Carrier Family 2 Member 1) |
| PPARD (Peroxisome Proliferator-Activated Receptor Delta) |
| NR1H3 (Nuclear Receptor Subfamily 1 Group H Member 3 / Liver X Receptor Alpha) |
| NR1H2 (Nuclear Receptor Subfamily 1 Group H Member 2 / Liver X Receptor Beta) |
| CPT1A (Carnitine Palmitoyltransferase 1A) |
| ACACA (Acetyl-CoA Carboxylase Alpha) |
| ACACB (Acetyl-CoA Carboxylase Beta) |
| FASN (Fatty Acid Synthase) |
| HMGCR (3-Hydroxy-3-Methylglutaryl-CoA Reductase) |
| FABP2 (Fatty Acid Binding Protein 2) |
| ANGPTL4 (Angiopoietin Like 4) |
| PLIN1 (Perilipin 1) |
| SREBF1C (Sterol Regulatory Element-Binding Protein 1C Isoform) |
| GCK (Glucokinase) |
| PDK4 (Pyruvate Dehydrogenase Kinase 4) |

**Table S2. Results of the Swiss-based target prediction for compound 1.**

| **NO.** | **Name** |
| --- | --- |
| 1 | 11-beta-hydroxysteroid dehydrogenase 1 |
| 2 | 6-phosphofructo-2-kinase/fructose-2,6-bisphosphatase 3 |
| 3 | Acetylcholinesterase |
| 4 | Acetyl-CoA carboxylase 2 |
| 5 | Acid alpha-glucosidase |
| 6 | ADAMTS5 |
| 7 | Adenosine A1 receptor (by homology) |
| 8 | Adenosine A3 receptor |
| 9 | Adrenergic receptor beta |
| 10 | Alpha-amylase 2A |
| 11 | Beta-1 adrenergic receptor |
| 12 | Beta-3 adrenergic receptor |
| 13 | Bradykinin B2 receptor |
| 14 | Brain adenylate cyclase 1 |
| 15 | Carbonic anhydrase I |
| 16 | Carbonic anhydrase II |
| 17 | Carnitine O-palmitoyltransferase 1, liver isoform (by homology) |
| 18 | Caspase-3 |
| 19 | Caspase-6 |
| 20 | Caspase-7 |
| 21 | Cyclooxygenase-2 |
| 22 | Cyclophilin A |
| 23 | Cytochrome P450 19A1 |
| 24 | Delta opioid receptor |
| 25 | Dual specificity phosphatase Cdc25A |
| 26 | Dual specificity protein phosphatase 3 |
| 27 | Epidermal growth factor receptor erbB1 |
| 28 | Estrogen receptor alpha |
| 29 | Forkhead box protein O1 |
| 30 | Gamma-secretase |
| 31 | Glucose transporter |
| 32 | Glutaminase kidney isoform, mitochondrial |
| 33 | Hexokinase type IV |
| 34 | Histone deacetylase 3 |
| 35 | HMG-CoA reductase (by homology) |
| 36 | Induced myeloid leukemia cell differentiation protein Mcl-1 |
| 37 | Insulin receptor |
| 38 | Insulin receptor substrate 1 |
| 39 | Insulin receptor substrate 2 |
| 40 | Kappa Opioid receptor |
| 41 | Leukocyte elastase |
| 42 | Low molecular weight phosphotyrosine protein phosphatase |
| 43 | Lysophosphatidic acid receptor 4 |
| 44 | Lysophosphatidic acid receptor 5 |
| 45 | Lysophosphatidic acid receptor 6 |
| 46 | Lysophosphatidic acid receptor Edg-2 |
| 47 | Lysophosphatidic acid receptor Edg-4 |
| 48 | Lysophosphatidic acid receptor Edg-7 |
| 49 | Macrophage colony stimulating factor receptor |
| 50 | Maltase-glucoamylase |
| 51 | MAP kinase ERK2 |
| 52 | Mu opioid receptor |
| 53 | NAD-dependent deacetylase sirtuin 2 |
| 54 | Pancreatic lipase |
| 55 | Pepsinogen C |
| 56 | Peptidyl-glycine alpha-amidating monooxygenase |
| 57 | P-glycoprotein 1 |
| 58 | Phosphatidylinositol 4,5-bisphosphate 3-kinase catalytic subunit alpha |
| 59 | Phosphodiesterase 4B |
| 60 | Phospholipase A2 group IIA |
| 61 | Phospholipase A2 group V |
| 62 | PI3-kinase p110-alpha subunit |
| 63 | PI3-kinase p110-gamma subunit |
| 64 | Platelet activating factor receptor (by homology) |
| 65 | Prolyl endopeptidase |
| 66 | Protein kinase C alpha |
| 67 | Protein kinase C delta |
| 68 | Protein kinase C epsilon |
| 69 | Protein kinase C eta (by homology) |
| 70 | Protein kinase C gamma |
| 71 | Protein kinase C theta |
| 72 | Protein phosphatase 2C beta |
| 73 | Proteinase-activated receptor 1 |
| 74 | Protein-tyrosine phosphatase 1B |
| 75 | Purinergic receptor P2Y12 |
| 76 | RAC-beta serine/threonine-protein kinase |
| 77 | Receptor protein-tyrosine kinase erbB-2 |
| 78 | Renin |
| 79 | Serine/threonine protein phosphatase PP1-alpha catalytic subunit |
| 80 | Serine/threonine protein phosphatase PP1-gamma catalytic subunit |
| 81 | Serine/threonine-protein kinase Aurora-A |
| 82 | Serine/threonine-protein kinase mTOR |
| 83 | Serine/threonine-protein phosphatase |
| 84 | Stem cell growth factor receptor |
| 85 | Transient receptor potential cation channel subfamily V member 4 (by homology) |
| 86 | Tyrosine-protein kinase BTK |
| 87 | Tyrosine-protein kinase ITK/TSK |
| 88 | Tyrosine-protein kinase receptor FLT3 |
| 89 | Tyrosine-protein kinase SRC |
| 90 | UDP-glucuronosyltransferase 2B7 |
| 91 | Vascular endothelial growth factor receptor 1 |
| 92 | Vascular endothelial growth factor receptor 2 |
| 93 | Vascular endothelial growth factor receptor 3 |
| 94 | Vitamin D receptor |

**Table S3. Results of theSwiss-based target prediction for compound 2.**

| **NO.** | **Name** |
| --- | --- |
| 1 | Beta-glucocerebrosidase (by homology) |
| 2 | Cytochrome P450 19A1 |
| 3 | Protein kinase C alpha |
| 4 | Protein kinase C epsilon |
| 5 | Protein kinase C theta |
| 6 | Protein kinase C eta (by homology) |
| 7 | Protein kinase C gamma (by homology) |
| 8 | DNA polymerase alpha subunit |
| 9 | Dual specificity phosphatase Cdc25A |
| 10 | Acyl coenzyme A:cholesterol acyltransferase |
| 11 | Protein kinase C delta (by homology) |
| 12 | Gamma-secretase |
| 13 | Heat shock protein HSP 90-alpha |
| 14 | NAD-dependent deacetylase sirtuin 2 |
| 15 | P-glycoprotein 1 |
| 16 | Cannabinoid receptor 1 (by homology) |
| 17 | Vascular endothelial growth factor A |
| 18 | Acidic fibroblast growth factor |
| 19 | Basic fibroblast growth factor |
| 20 | Heparanase |
| 21 | UDP-glucuronosyltransferase 2B7 |
| 22 | Peptidyl-glycine alpha-amidating monooxygenase |
| 23 | Dynamin-1 |
| 24 | HMG-CoA reductase (by homology) |
| 25 | 11-beta-hydroxysteroid dehydrogenase 1 (by homology) |
| 26 | Acetylcholinesterase |
| 27 | Sonic hedgehog protein (by homology) |
| 28 | Cytochrome P450 51 (by homology) |
| 29 | Niemann-Pick C1-like protein 1 |
| 30 | Galectin-4 |
| 31 | Galectin-3 |
| 32 | Galectin-8 |
| 33 | Transient receptor potential cation channel subfamily V member 4 (by homology) |
| 34 | Carnitine O-palmitoyltransferase 1, liver isoform (by homology) |
| 35 | Cannabinoid receptor 2 |
| 36 | Protein phosphatase 2C beta |
| 37 | Protein-tyrosine phosphatase 1B |
| 38 | Serine/threonine protein phosphatase PP1-gamma catalytic subunit |
| 39 | Cyclin-dependent kinase 1 |
| 40 | Lysophosphatidic acid receptor 6 |
| 41 | Lysophosphatidic acid receptor Edg-7 |
| 42 | Lysophosphatidic acid receptor Edg-4 |
| 43 | Lysophosphatidic acid receptor Edg-2 |
| 44 | Lysophosphatidic acid receptor 5 |
| 45 | Lysophosphatidic acid receptor 4 |
| 46 | Cathepsin K |
| 47 | Cathepsin L |
| 48 | Cathepsin (B and K) |
| 49 | Phosphodiesterase 4D |
| 50 | Vitamin D receptor |
| 51 | Carboxylesterase 2 |
| 52 | Nuclear receptor ROR-gamma |
| 53 | Carbonic anhydrase II |
| 54 | Carbonic anhydrase I |
| 55 | Estradiol 17-beta-dehydrogenase 3 |
| 56 | Kappa Opioid receptor |
| 57 | Serine/threonine-protein phosphatase |
| 58 | Serine/threonine protein phosphatase PP1-alpha catalytic subunit |
| 59 | Serotonin 2b (5-HT2b) receptor |
| 60 | Alpha-2a adrenergic receptor |
| 61 | Adrenergic receptor alpha-2 |
| 62 | Alpha-2b adrenergic receptor |
| 63 | Dopamine D1 receptor |
| 64 | Dopamine D2 receptor |
| 65 | Alpha-1d adrenergic receptor |
| 66 | Serotonin 2a (5-HT2a) receptor |
| 67 | Serotonin 2c (5-HT2c) receptor |
| 68 | Dopamine D3 receptor |
| 69 | Cytochrome P450 2D6 |
| 70 | Serotonin 6 (5-HT6) receptor |
| 71 | Alpha-1a adrenergic receptor (by homology) |
| 72 | Serotonin 1b (5-HT1b) receptor (by homology) |
| 73 | Anandamide amidohydrolase |
| 74 | Signal transducer and activator of transcription 3 |
| 75 | Peroxisome proliferator-activated receptor gamma |
| 76 | Peroxisome proliferator-activated receptor alpha |
| 77 | 5'-AMP-activated protein kinase catalytic subunit alpha-1 |
| 78 | Sterol regulatory element-binding protein 1 |
| 79 | Sterol regulatory element-binding protein 2 |
| 80 | Lipoprotein lipase |
| 81 | Apolipoprotein E |
| 82 | Serine/threonine-protein kinase mTOR |
| 83 | Macrophage-stimulating protein receptor |
| 84 | Tumor necrosis factor |

**Table S4. Results of theSwiss-based target prediction for compound 3.**

| **NO.** | **Name** |
| --- | --- |
| 1 | Acid ceramidase (by homology) |
| 2 | ADAM17 |
| 3 | Adenosine A1 receptor (by homology) |
| 4 | Adiponectin |
| 5 | Adrenergic receptor beta |
| 6 | ALK tyrosine kinase receptor |
| 7 | Androgen Receptor |
| 8 | Beta amyloid A4 protein |
| 9 | Beta-1 adrenergic receptor |
| 10 | Beta-3 adrenergic receptor |
| 11 | Bromodomain-containing protein 2 |
| 12 | Bromodomain-containing protein 4 |
| 13 | C-C chemokine receptor type 1 |
| 14 | CDC7/DBF4 (Cell division cycle 7-related protein kinase/Activator of S phase kinase) |
| 15 | CREB-binding protein/p53 |
| 16 | Cyclin-dependent kinase 2 |
| 17 | Cyclin-dependent kinase 5/CDK5 activator 1 |
| 18 | Cyclin-dependent kinase 9 |
| 19 | Cyclooxygenase-2 |
| 20 | Cytochrome P450 19A1 |
| 21 | DNA-dependent protein kinase |
| 22 | Dual serine/threonine and tyrosine protein kinase |
| 23 | Dual specificity mitogen-activated protein kinase kinase 1 |
| 24 | Ephrin receptor |
| 25 | Eukaryotic translation initiation factor 2-alpha kinase 3 |
| 26 | Fatty acid-binding protein, adipocyte |
| 27 | FK506-binding protein 1A |
| 28 | G protein-coupled receptor kinase 7 |
| 29 | Gamma-secretase |
| 30 | Glycogen synthase kinase 3 beta |
| 31 | Homeodomain-interacting protein kinase 4 |
| 32 | Hormonally up-regulated neu tumor-associated kinase |
| 33 | Interleukin-6 |
| 34 | Interleukin-8 receptor A |
| 35 | Interleukin-8 receptor B |
| 36 | Kappa Opioid receptor |
| 37 | Kinesin-1 heavy chain/ Tyrosine-protein kinase receptor RET |
| 38 | Leptin |
| 39 | Leucine-rich repeat serine/threonine-protein kinase 2 |
| 40 | Liver glycogen phosphorylase |
| 41 | Macrophage colony stimulating factor receptor |
| 42 | MAP kinase ERK2 |
| 43 | MAP kinase p38 alpha |
| 44 | MAP kinase signal-integrating kinase 2 |
| 45 | Matrix metalloproteinase 1 |
| 46 | Matrix metalloproteinase 2 |
| 47 | Matrix metalloproteinase 3 |
| 48 | Microtubule-associated serine/threonine-protein kinase 1 |
| 49 | Mitogen-activated protein kinase 8 |
| 50 | Mitogen-activated protein kinase kinase kinase 12 |
| 51 | Mitogen-activated protein kinase kinase kinase 13 |
| 52 | Mitogen-activated protein kinase kinase kinase 15 |
| 53 | Myeloperoxidase |
| 54 | Nerve growth factor receptor Trk-A |
| 55 | p53-binding protein Mdm-2 |
| 56 | Peroxisome proliferator-activated receptor gamma |
| 57 | P-glycoprotein 1 |
| 58 | Phosphatase and tensin homolog |
| 59 | Platelet-derived growth factor receptor beta |
| 60 | Poly [ADP-ribose] polymerase-1 |
| 61 | Potassium-transporting ATPase alpha chain 2 |
| 62 | Presenilin 1 |
| 63 | Presenilin 2 |
| 64 | Progesterone receptor |
| 65 | Protein kinase C alpha |
| 66 | Protein kinase C epsilon |
| 67 | Protein-tyrosine phosphatase 1B |
| 68 | Rho-associated protein kinase 1 |
| 69 | Ribosomal protein S6 kinase alpha 5 |
| 70 | Serine/threonine-protein kinase 38 |
| 71 | Serine/threonine-protein kinase ICK |
| 72 | Serine/threonine-protein kinase OSR1 |
| 73 | Serine/threonine-protein kinase PIM1 |
| 74 | Serine/threonine-protein kinase PIM2 |
| 75 | Serine/threonine-protein kinase PRP4 homolog |
| 76 | Serine/threonine-protein kinase SBK1 |
| 77 | Serine/threonine-protein kinase/endoribonuclease IRE1 |
| 78 | Serotonin 2b (5-HT2b) receptor |
| 79 | SNF-related serine/threonine-protein kinase |
| 80 | Sodium channel protein type IX alpha subunit |
| 81 | Solute carrier family 2, facilitated glucose transporter member 4 |
| 82 | STE20/SPS1-related proline-alanine-rich protein kinase |
| 83 | Stem cell growth factor receptor |
| 84 | Suppressor of cytokine signaling 3 |
| 85 | Transketolase |
| 86 | Tubulin--tyrosine ligase |
| 87 | Tyrosine-protein kinase ABL |
| 88 | Tyrosine-protein kinase FYN |
| 89 | Tyrosine-protein kinase JAK1 |
| 90 | Tyrosine-protein kinase JAK2 |
| 91 | Tyrosine-protein kinase JAK3 |
| 92 | Tyrosine-protein kinase LCK |
| 93 | Tyrosine-protein kinase SYK |
| 94 | Tyrosine-protein kinase TYK2 |
| 95 | Vascular endothelial growth factor receptor 1 |
| 96 | Vascular endothelial growth factor receptor 2 |
| 97 | Vascular endothelial growth factor receptor 3 |
| 98 | Voltage-gated potassium channel subunit Kv1.5 |

**Table S5. Results of theSwiss-based target prediction for compound 4.**

| **NO.** | **Name** |
| --- | --- |
| 1 | 11-beta-hydroxysteroid dehydrogenase 1 |
| 2 | 11-beta-hydroxysteroid dehydrogenase 2 (by homology) |
| 3 | 2-acylglycerol O-acyltransferase 2 |
| 4 | 6-phosphofructo-2-kinase/fructose-2,6-bisphosphatase 3 |
| 5 | Adrenergic receptor alpha-2 |
| 6 | Aldehyde dehydrogenase |
| 7 | ALK tyrosine kinase receptor |
| 8 | Alpha-1a adrenergic receptor |
| 9 | Alpha-1b adrenergic receptor |
| 10 | Anandamide amidohydrolase |
| 11 | Angiotensin-converting enzyme (by homology) |
| 12 | Apoptosis regulator Bcl-2 |
| 13 | ATP-citrate synthase |
| 14 | Autotaxin |
| 15 | Butyrylcholinesterase |
| 16 | Cannabinoid receptor 1 |
| 17 | Cannabinoid receptor 2 |
| 18 | CCAAT/enhancer-binding protein alpha |
| 19 | CCAAT/enhancer-binding protein beta |
| 20 | c-Jun N-terminal kinase 1 |
| 21 | Cyclin-dependent kinase 2 |
| 22 | Cyclin-dependent kinase 2/cyclin E |
| 23 | Delta opioid receptor (by homology) |
| 24 | Diacylglycerol O-acyltransferase 2 |
| 25 | Dopamine D2 receptor |
| 26 | Dopamine D3 receptor |
| 27 | Dopamine D4 receptor |
| 28 | Dopamine transporter |
| 29 | Dual specificity phosphatase Cdc25A |
| 30 | Dual specificity phosphatase Cdc25B |
| 31 | Dual specificity protein phosphatase 3 |
| 32 | Epoxide hydratase |
| 33 | Estrogen receptor alpha |
| 34 | Glucose-dependent insulinotropic receptor |
| 35 | Glycogen synthase kinase-3 alpha |
| 36 | Gonadotropin-releasing hormone receptor |
| 37 | Hepatocyte growth factor receptor |
| 38 | Histamine H3 receptor |
| 39 | Histone deacetylase 1 |
| 40 | Histone deacetylase 3 |
| 41 | Hormone-sensitive lipase |
| 42 | Insulin-like growth factor I receptor |
| 43 | Intercellular adhesion molecule (ICAM-1), Integrin alpha-L/beta-2 |
| 44 | LXR-alpha |
| 45 | Lysophosphatidic acid receptor Edg-4 |
| 46 | MAP kinase p38 alpha |
| 47 | MAP kinase p38 gamma |
| 48 | Medium-chain specific acyl-CoA dehydrogenase |
| 49 | Mitochondrial uncoupling protein 1 |
| 50 | Mu opioid receptor (by homology) |
| 51 | Niemann-Pick C1-like protein 1 |
| 52 | NPM/ALK (Nucleophosmin/ALK tyrosine kinase receptor) |
| 53 | Peptidyl-prolyl cis-trans isomerase FKBP5 |
| 54 | Peroxisome proliferator-activated receptor alpha |
| 55 | Peroxisome proliferator-activated receptor gamma |
| 56 | Phosphodiesterase 4B |
| 57 | PI3-kinase p110-alpha subunit |
| 58 | PI3-kinase p110-gamma subunit |
| 59 | Prostaglandin E synthase |
| 60 | Prostanoid EP2 receptor |
| 61 | Prostanoid EP3 receptor |
| 62 | Prostanoid EP4 receptor |
| 63 | Protein farnesyltransferase |
| 64 | Protein kinase C delta |
| 65 | Protein kinase C epsilon |
| 66 | Protein kinase C eta |
| 67 | Protein kinase C theta |
| 68 | Receptor protein-tyrosine kinase erbB-2 |
| 69 | Rho-associated protein kinase 1 |
| 70 | Rho-associated protein kinase 2 |
| 71 | Ribosomal protein S6 kinase alpha 1 |
| 72 | Ribosomal protein S6 kinase alpha 5 |
| 73 | Serine/threonine-protein kinase AKT |
| 74 | Serine/threonine-protein kinase AKT |
| 75 | Serine/threonine-protein kinase AKT2 |
| 76 | Serine/threonine-protein kinase Chk1 |
| 77 | Serine/threonine-protein kinase mTOR |
| 78 | Serotonin 1d (5-HT1d) receptor |
| 79 | Serotonin transporter |
| 80 | Sphingosine 1-phosphate receptor Edg-1 |
| 81 | Sphingosine 1-phosphate receptor Edg-3 |
| 82 | Sphingosine 1-phosphate receptor Edg-5 |
| 83 | Sphingosine kinase 1 |
| 84 | Squalene synthetase (by homology) |
| 85 | Stearoyl-CoA desaturase-1 |
| 86 | Steroid 5-alpha-reductase 2 |
| 87 | TRAF2- and NCK-interacting kinase |
| 88 | Tyrosine-protein kinase HCK |
| 89 | Vanilloid receptor |
| 90 | Vasopressin V1a receptor |
| 91 | Vasopressin V1b receptor |
| 92 | Vitamin D3 receptor-interacting protein |

**Table S6. Results of theSwiss-based target prediction for compound 5.**

| **NO.** | **Name** |
| --- | --- |
| 1 | 11-beta-hydroxysteroid dehydrogenase 1 |
| 2 | Adrenergic receptor alpha-2 |
| 3 | Alpha-1a adrenergic receptor (by homology) |
| 4 | Alpha-1d adrenergic receptor |
| 5 | Alpha-2a adrenergic receptor |
| 6 | Alpha-2b adrenergic receptor |
| 7 | Anandamide amidohydrolase |
| 8 | Androgen Receptor |
| 9 | Arachidonate 5-lipoxygenase |
| 10 | Aromatase (cytochrome P450 19A1) |
| 11 | Autotaxin |
| 12 | Beta-glucocerebrosidase (by homology) |
| 13 | Bile acid receptor FXR |
| 14 | Brain adenylate cyclase 1 |
| 15 | Cannabinoid receptor 1 (by homology) |
| 16 | Cannabinoid receptor 2 (by homology) |
| 17 | Carbonic anhydrase I |
| 18 | Carbonic anhydrase II |
| 19 | Carbonic anhydrase IX |
| 20 | Carboxylesterase 2 |
| 21 | Carnitine O-palmitoyltransferase 1, liver isoform (by homology) |
| 22 | Chymotrypsin C |
| 23 | Cyclooxygenase-2 |
| 24 | Cytochrome P450 19A1 |
| 25 | Cytochrome P450 2D6 |
| 26 | DNA polymerase alpha subunit |
| 27 | DNA polymerase beta |
| 28 | DNA topoisomerase I |
| 29 | DNA topoisomerase II alpha |
| 30 | DNA topoisomerase II beta |
| 31 | Dopamine D1 receptor |
| 32 | Dopamine D2 receptor |
| 33 | Dopamine D3 receptor |
| 34 | Dual specificity phosphatase Cdc25A |
| 35 | Estradiol 17-beta-dehydrogenase 3 |
| 36 | Gamma-secretase |
| 37 | Glucagon-like peptide 1 receptor |
| 38 | Glucose transporter |
| 39 | Glycine receptor subunit alpha-1 |
| 40 | Glycine receptor subunit alpha-2 |
| 41 | G-protein coupled receptor 55 |
| 42 | HMG-CoA reductase (by homology) |
| 43 | Kappa Opioid receptor |
| 44 | Lysophosphatidic acid receptor 4 |
| 45 | Lysophosphatidic acid receptor 5 |
| 46 | Lysophosphatidic acid receptor 6 |
| 47 | Lysophosphatidic acid receptor Edg-2 |
| 48 | Lysophosphatidic acid receptor Edg-4 |
| 49 | Lysophosphatidic acid receptor Edg-7 |
| 50 | Mitochondrial carnitine/acylcarnitine carrier protein |
| 51 | Monoglyceride lipase |
| 52 | Mu opioid receptor |
| 53 | Muscarinic acetylcholine receptor M2 |
| 54 | NAD-dependent deacetylase sirtuin 2 |
| 55 | NAD-dependent protein deacetylase sirtuin-1 |
| 56 | Nitric oxide synthase, inducible (by homology) |
| 57 | Nuclear receptor ROR-gamma |
| 58 | Peptidyl-glycine alpha-amidating monooxygenase |
| 59 | P-glycoprotein 1 |
| 60 | Platelet activating factor receptor (by homology) |
| 61 | Probable G-protein coupled receptor 174 |
| 62 | Probable G-protein coupled receptor 34 |
| 63 | Prolyl endopeptidase |
| 64 | Prostaglandin E synthase |
| 65 | Protein kinase C alpha |
| 66 | Protein kinase C delta (by homology) |
| 67 | Protein kinase C epsilon |
| 68 | Protein kinase C eta (by homology) |
| 69 | Protein kinase C gamma (by homology) |
| 70 | Protein kinase C theta |
| 71 | Protein phosphatase 2C alpha |
| 72 | Protein phosphatase 2C beta |
| 73 | Protein-tyrosine phosphatase 1B |
| 74 | Putative P2Y purinoceptor 10 |
| 75 | Serine/threonine protein phosphatase PP1-alpha catalytic subunit |
| 76 | Serine/threonine protein phosphatase PP1-gamma catalytic subunit |
| 77 | Serine/threonine-protein phosphatase |
| 78 | Serotonin 1b (5-HT1b) receptor (by homology) |
| 79 | Serotonin 2a (5-HT2a) receptor |
| 80 | Serotonin 2b (5-HT2b) receptor |
| 81 | Serotonin 2c (5-HT2c) receptor |
| 82 | Serotonin 6 (5-HT6) receptor |
| 83 | Sn1-specific diacylglycerol lipase alpha |
| 84 | T-cell protein-tyrosine phosphatase |
| 85 | Thrombin |
| 86 | Toll-like receptor (TLR7/TLR9) |
| 87 | Transient receptor potential cation channel subfamily V member 4 (by homology) |
| 88 | Trypsin I |
| 89 | UDP-glucuronosyltransferase 2B7 |
| 90 | Vanilloid receptor |
| 91 | Vascular endothelial growth factor receptor 2 |
| 92 | Vitamin D receptor |

**Table S7: Docking scores and refinement RMSD values of 5 isolated compounds from *Sinularia levi* against α‑glucosidase.**

| **#** | **Compound (Manuscript ID)** | **Docking S-score (kcal/mol)** | **RMSD (Å)** |
| --- | --- | --- | --- |
| 1 | Glyceryl tridecyloxy nonanoate (1) | –6.5 | 2.7 |
| 2 | **Glyceryl nonacosanol (2)** | **–8.5** | **1.2** |
| 3 | Sinumaximol G (3) | –6.8 | 2.4 |
| 4 | Ceramide (4) | –7.2 | 2.1 |
| 5 | Glyceryl pentacosanoate (5) | –7.9 | 1.6 |
| 6 | Acarbose (control) | –9.3 | 0.9 |
